# Supplementary material for: Nonvolatile memory based on pentacene organic field-effect transistors with polystyrene para-substituted oligofluorene pendent moieties as polymer electrets
Source: Royal Society of Chemistry journal article supplement (doi:10.1039/c2jm16039k), 2012-01-01
Supplement: c2jm16039k.pdf [file c2jm16039k.pdf]

## Supporting information

### **Nonvolatile Memory Based on Pentacene Organic Field-Effect Transistors with Polystyrene *para*-Substituted Oligofluorene Pendent Moieties as Polymer Electrets**

Jung-Ching Hsu,<sup>a</sup> Wen-Ya Lee,<sup>a</sup> Hung-Chin Wu,<sup>a</sup> Kenji Sugiyama,<sup>b</sup>

Akira Hirao<sup>b,\*</sup> and Wen-Chang Chen<sup>a,\*</sup>

<sup>a</sup> Department of Chemical Engineering, National Taiwan University, Taipei, Taiwan

<sup>c</sup> Department of Chemical Science and Technology, Faculty of Bioscience and Applied  
Chemistry, Hosei University, Tokyo, Japan

<sup>d</sup> Department of Organic and Polymeric Materials, Tokyo Institute of Technology,  
2-12-1 Ookayama, Meguro-ku, Tokyo, Japan

\*To whom all correspondence should be addressed.

Wen-Chang Chen (e-mail: chenwc@ntu.edu.tw);

Akira Hirao (e-mail: ahirao@polymer.titech.ac.jp)

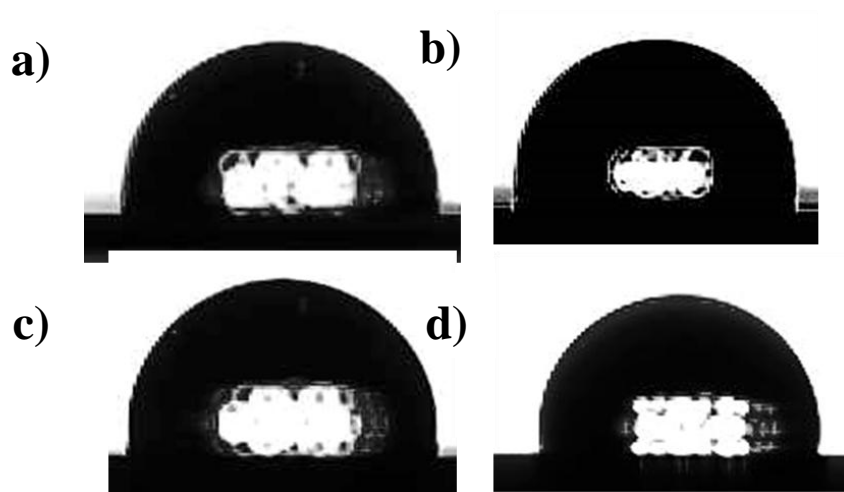

**Fig. S1.** Contact angles of various polymer electrets: a) PS, b) P(St-Fl), c) P(St-Fl)<sub>2</sub>  
d)P(St-Fl)<sub>3</sub>.

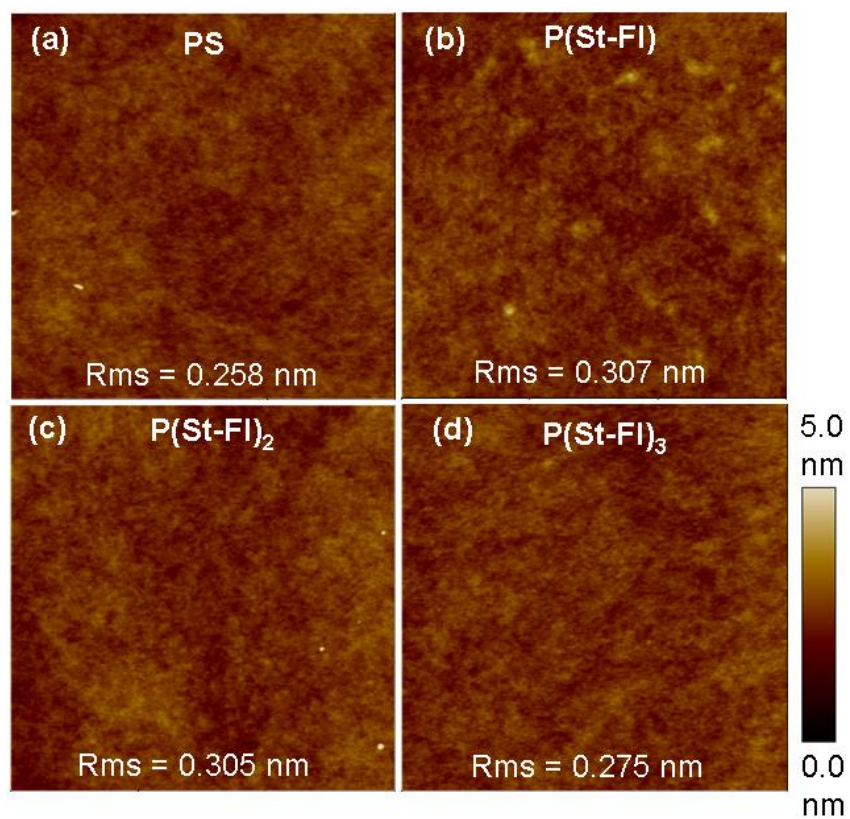

**Fig. S2.** Atomic force microscopy (AFM) topographies of (a) PS, (b), P(St-Fl), (c) P(St-Fl)<sub>2</sub> and (d) P(St-Fl)<sub>3</sub> spin-coated on bare SiO<sub>2</sub> substrates on 3 μm x 3 μm areas.

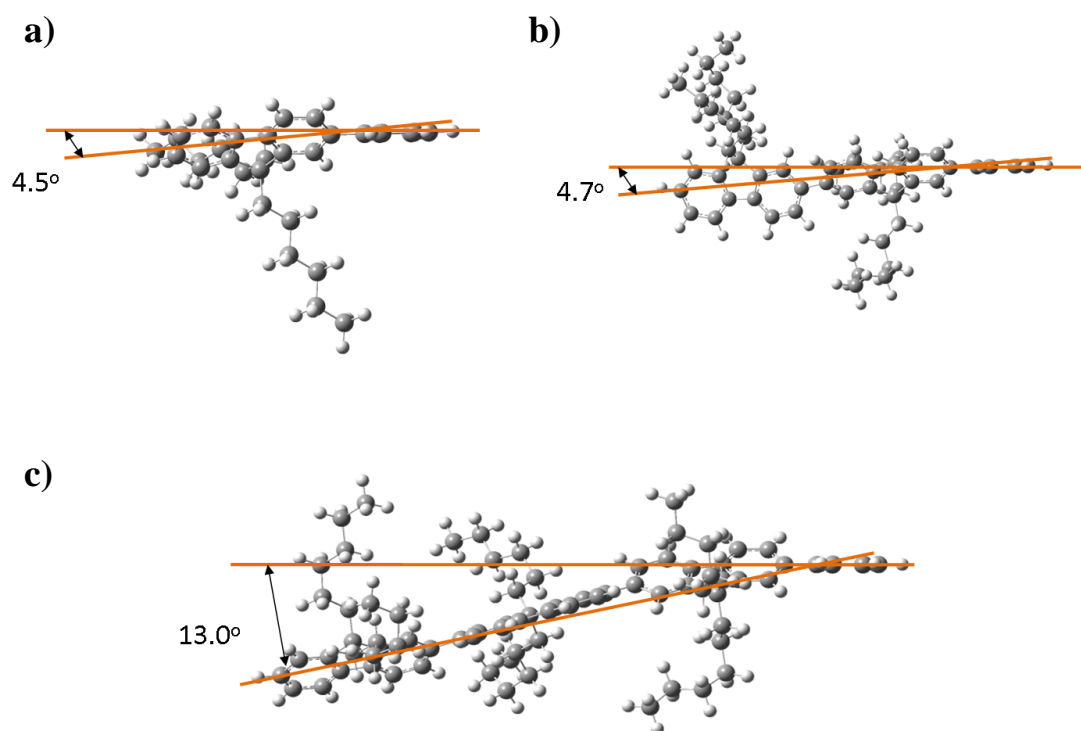

**Fig. S3.** Illustrated conformations of the structures with *para*-substitute a) mono-, b) di-, and c) tri- fluorene unit.

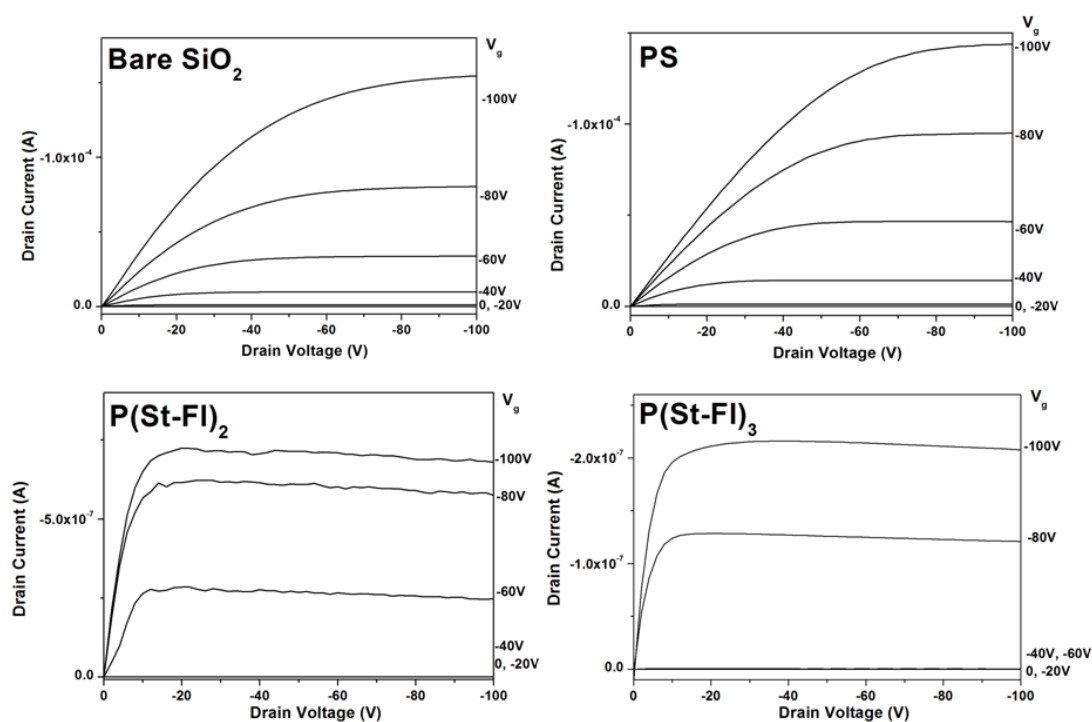

**Fig. S4.** Output characteristics of pentacene-based OFET memory devices.

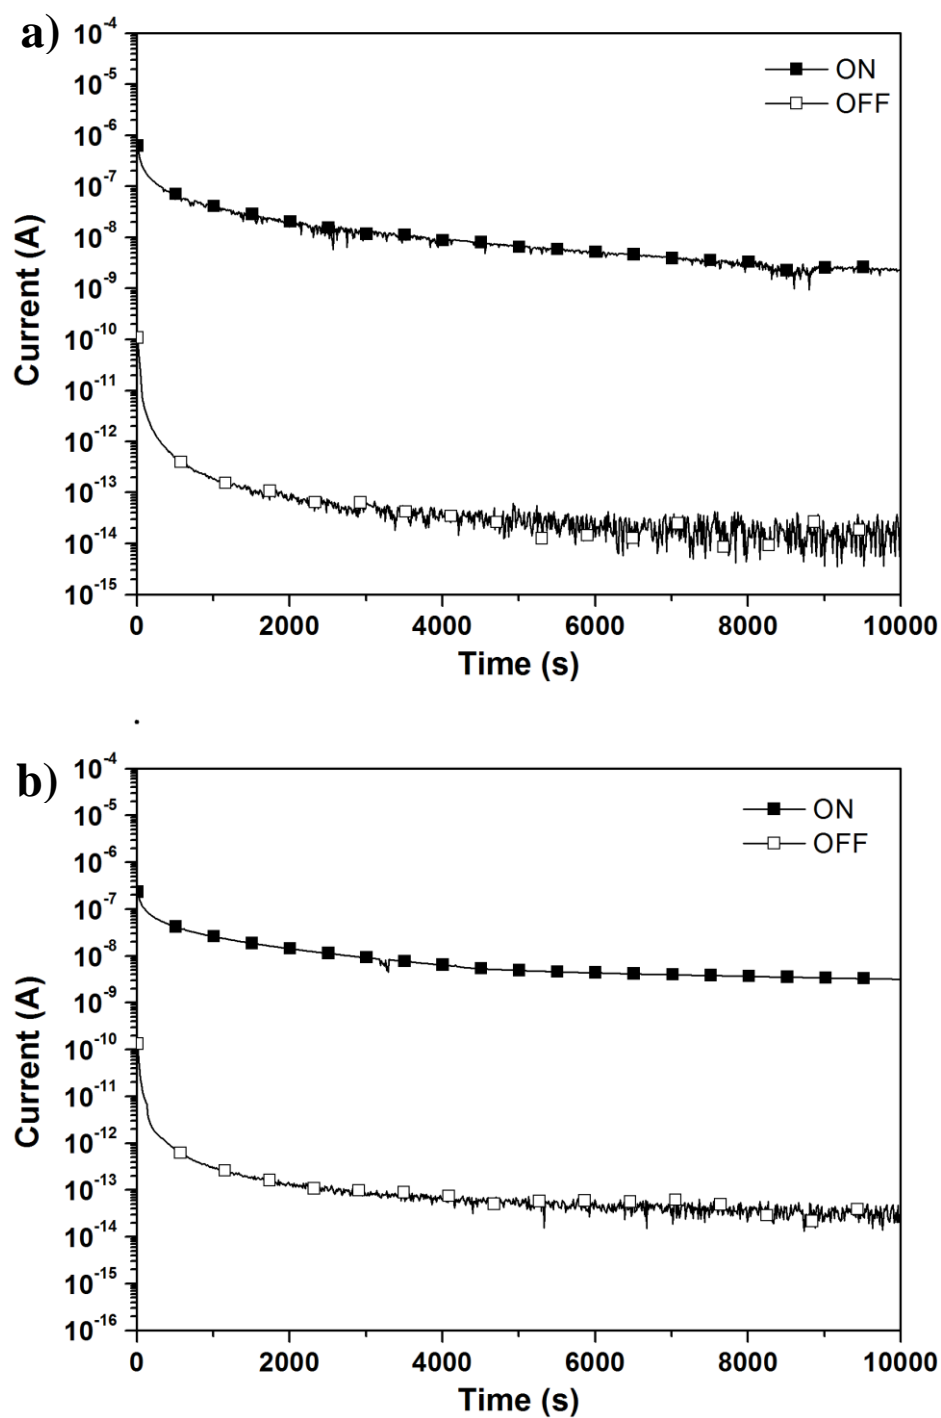

**Fig. S5.** Retention time of pentacene-based OFET memory device with a) P(St-Fl)<sub>2</sub>

and b) P(St-Fl)<sub>3</sub> as polymer electrets, after writing and erasing process.

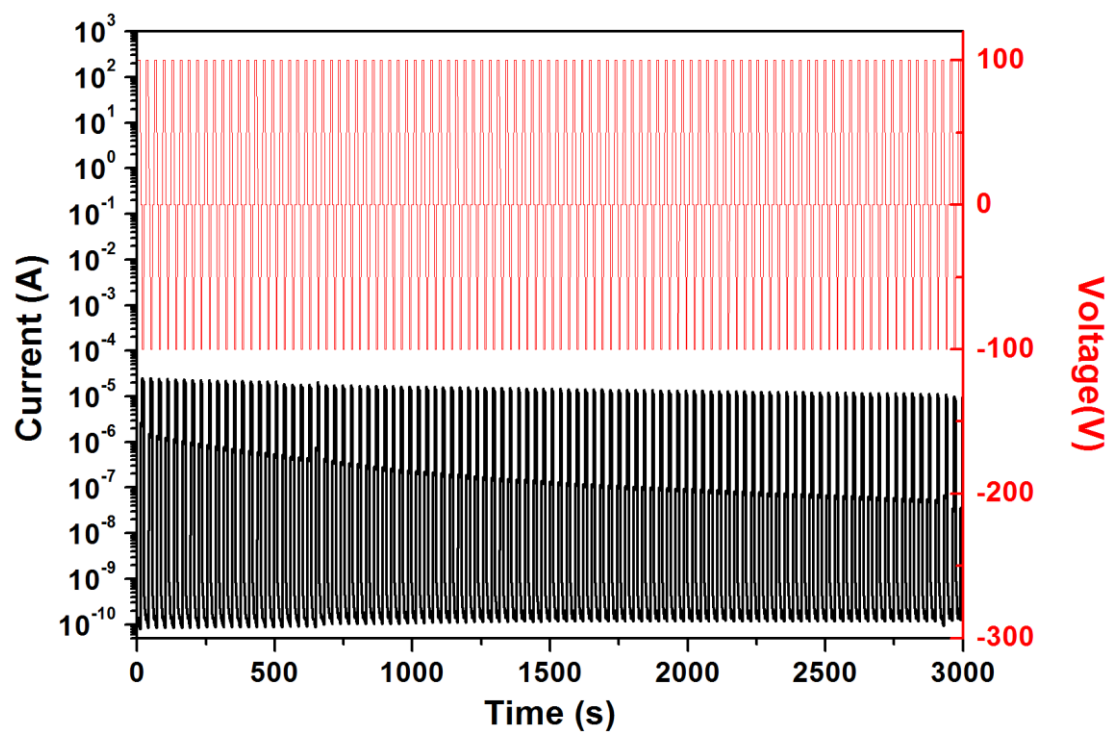

**Fig. S6.** Reversible switching for the ON- and OFF- states of pentacene-based OFET

memory device with P(St-Fl) as polymer electret.

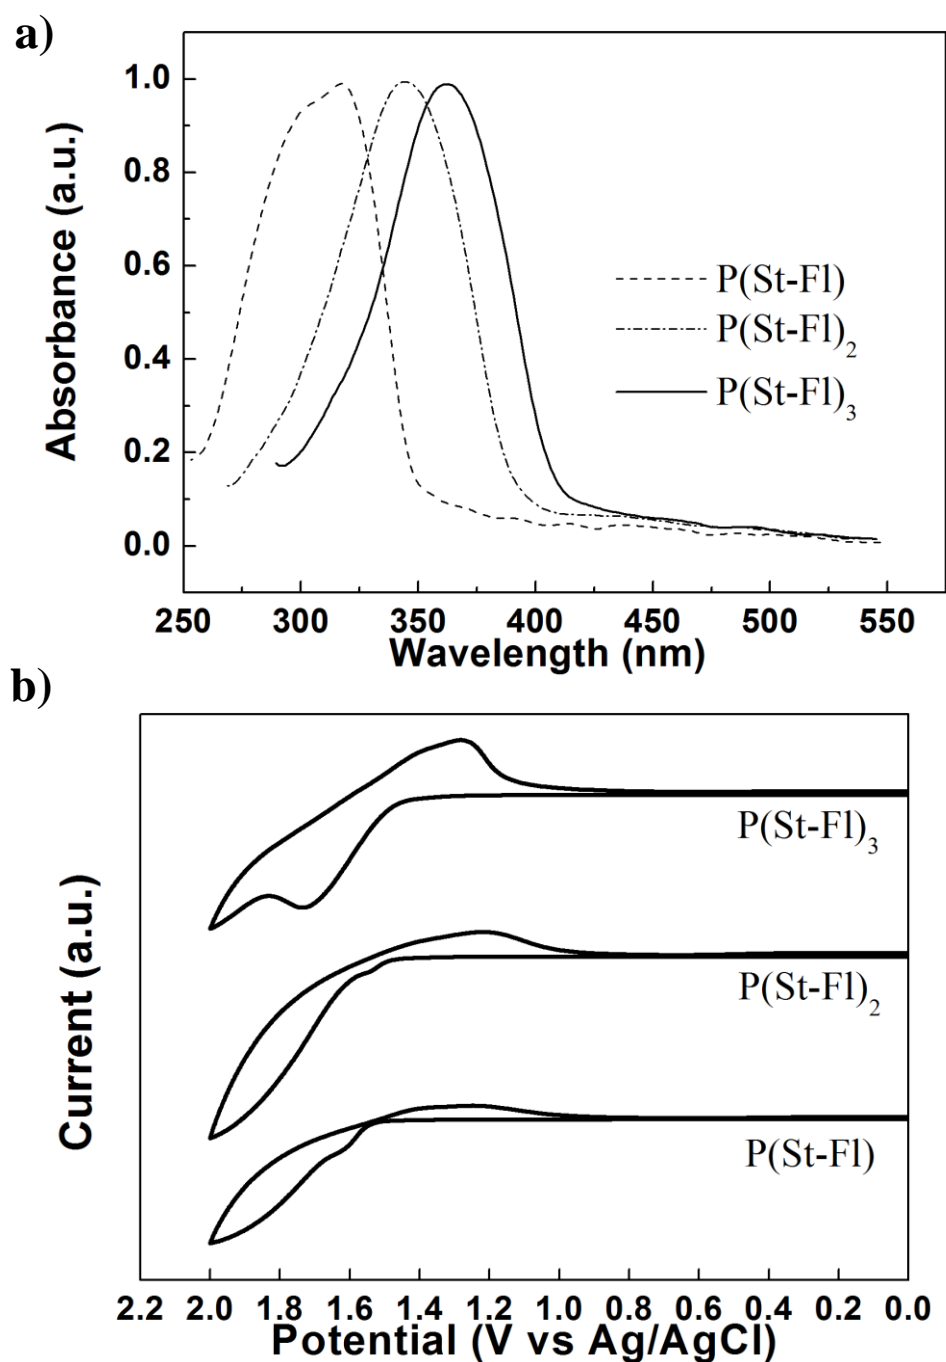

**Fig.S7.** a) Optical absorption spectra of the P(St-Fl)<sub>n</sub> (n=1-3) thin films. b) Cyclic voltammograms of P(St-Fl)<sub>n</sub> (n=1-3) in 0.1 M TBAP/acetonitrile solution. The HOMO energy level was determined from the onset oxidation potential ( $E_{\text{onset}}^{\text{ox}}$ ) and estimated on the basis of the reference energy level of ferrocene (4.8 eV). The relation is shown by the following equations:  $\text{HOMO (eV)} = -e(E_{\text{ox}}^{\text{onset}} - E_{1/2, \text{ferrocene}} + 4.8 \text{ eV})$ . The LUMO energy level of was determined by the difference between HOMO level and optical band gap and estimated by the following equations:  $\text{LUMO (eV)} = \text{HOMO} + E_{\text{g}}^{\text{opt}}$ .

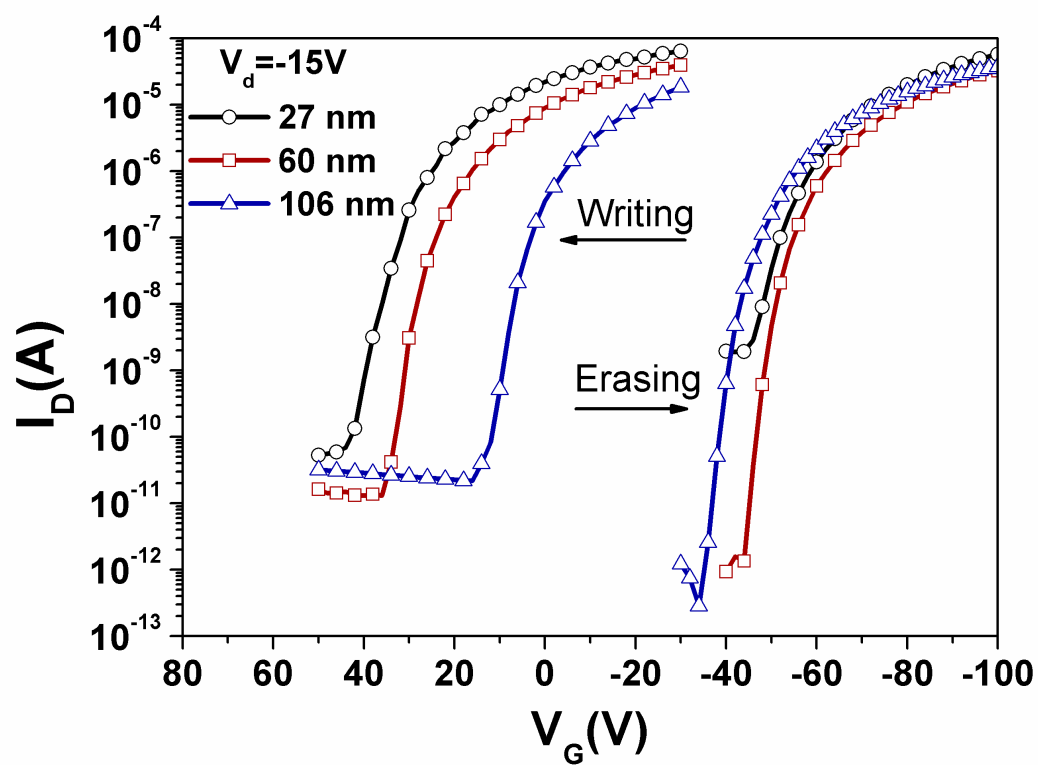

**Fig. S8.** Transfer curves of the pentacene-based OFET memory device based on the P(St-Fl) polymer electret using different thicknesses.
